# Supplementary material for: Increased Susceptibility and Intrinsic Apoptotic Signaling in Neurons by Induced HDAC3 Expression
Source: PubMed Central journal article supplement — Invest Ophthalmol Vis Sci. 2021 Aug 16;62(10):14. doi: 10.1167/iovs.62.10.14 (PMC8375002; doi:10.1167/iovs.62.10.14), 2021-08-16
Supplement: iovs-62-10-14_s002.pdf [file iovs-62-10-14_s002.pdf]

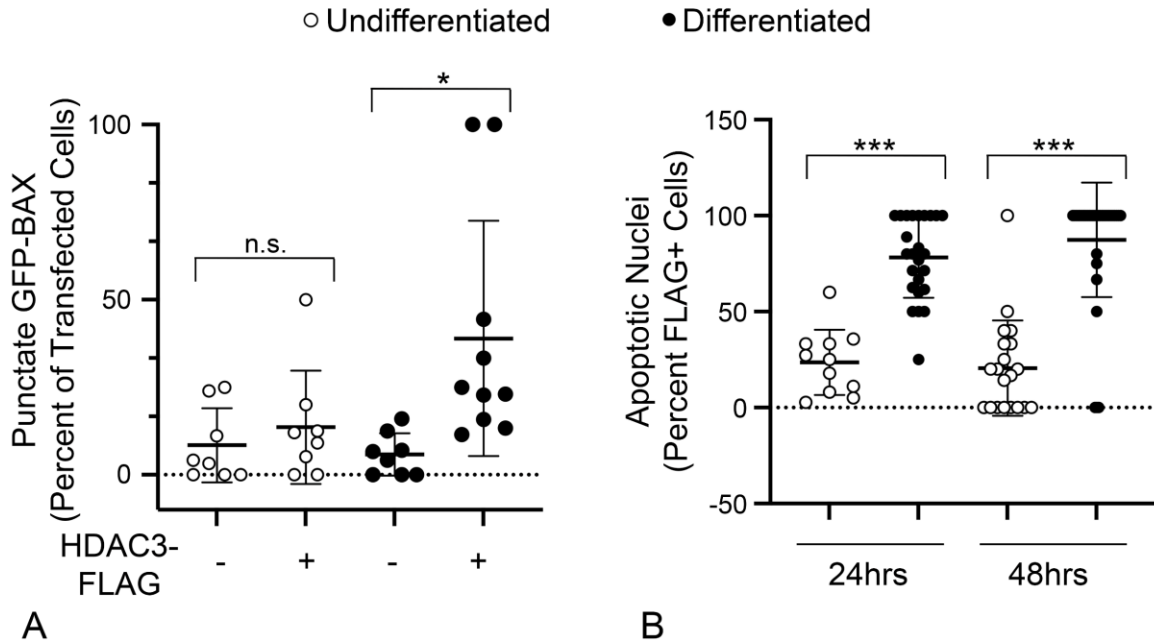

Supplemental Figure S2: Punctate GFP-BAX and apoptotic nuclei result from induced HDAC3-FLAG expression in differentiated 661W cells. (A) Quantification of cells with punctate GFP-BAX distribution, 24 hours after transfection. Only differentiated 661W cells expressing HDAC3-FLAG show a significant increase in GFP-BAX recruitment (\* $P < 0.005$ ). (B) Evaluation of undifferentiated and differentiated 661W cells positive for HDAC3-FLAG expression at 24 hours after transfection. Cell death was monitored by the formation of condensed and fragmented nuclei. Differentiated cells show a significant increase in apoptotic nuclear morphology compared to undifferentiated cells expressing HDAC3-FLAG (\* $P < 0.005$ ).
