# Supplementary material for: Increased Susceptibility and Intrinsic Apoptotic Signaling in Neurons by Induced HDAC3 Expression
Source: PubMed Central journal article supplement — Invest Ophthalmol Vis Sci. 2021 Aug 16;62(10):14. doi: 10.1167/iovs.62.10.14 (PMC8375002; doi:10.1167/iovs.62.10.14), 2021-08-16
Supplement: iovs-62-10-14_s003.pdf [file iovs-62-10-14_s003.pdf]

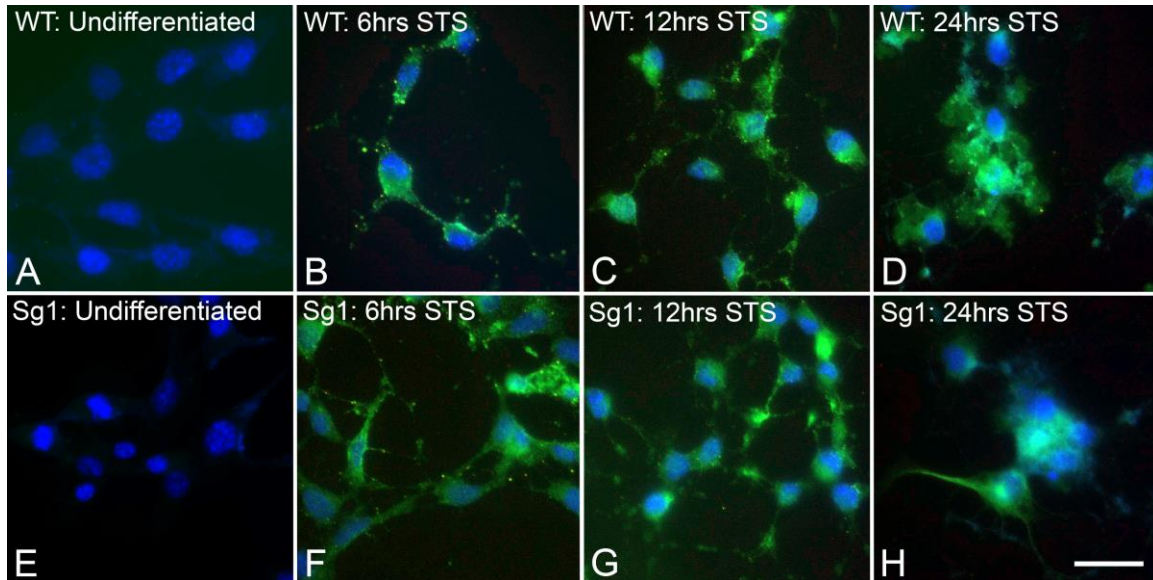

Supplemental Figure S3: WT and edited Sg1 cells show typical features of differentiation including the increased staining for  $\beta$ III-tubulin (green). (A-H) Panels show different times after addition of 316 nM staurosporine (STS) to induce differentiation. Size bar = 10  $\mu$ m. DAPI counterstain.
